# Supplementary material for: Non-Toxic Gold Nanoclusters for Solution-Processed White Light-Emitting Diodes
Source: PubMed Central journal article supplement (PMC5995872; doi:10.1038/s41598-018-27201-x), 2018-06-11
Supplement: 41598_2018_27201_MOESM1_ESM.pdf [file 41598_2018_27201_MOESM1_ESM.pdf]

## Supporting Information

### **Non-Toxic Gold Nanoclusters for Solution-Processed White Light-Emitting Diodes**

Yu-Chiang Chao<sup>1</sup>, Kai-Ping Cheng<sup>2</sup>, Ching-Yi Lin<sup>2</sup>, Yu-Li Chang<sup>2</sup>, Yi-Yun Ko<sup>3</sup>, Tzu-Yin Hou<sup>3</sup>, Cheng-Yi Huang<sup>3</sup>, Walter H. Chang<sup>3</sup> and Cheng-An J. Lin<sup>3</sup>

<sup>1</sup>Department of Physics, National Taiwan Normal University, Taipei 11677, Taiwan.

<sup>2</sup>Department of Physics and Center for Nanotechnology, Chung Yuan Christian University, Chung-Li 32023, Taiwan

<sup>3</sup> Department of Biomedical Engineering and Center for Biomedical Technology, Chung Yuan Christian University, Chung-Li 32023, Taiwan

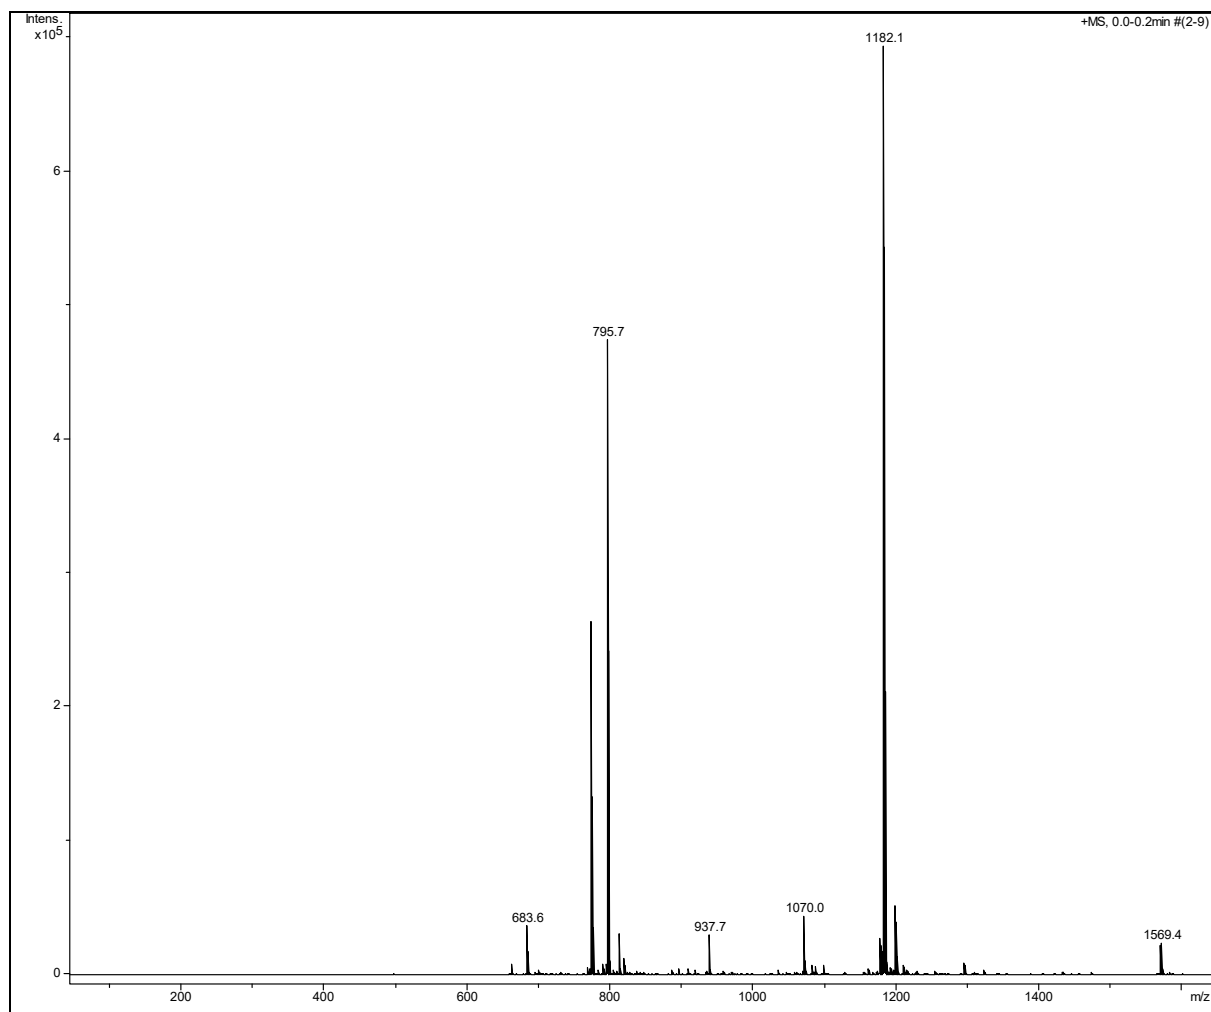

**Figure S1.** Mass spectra of Au NCs with TOP surface modification.

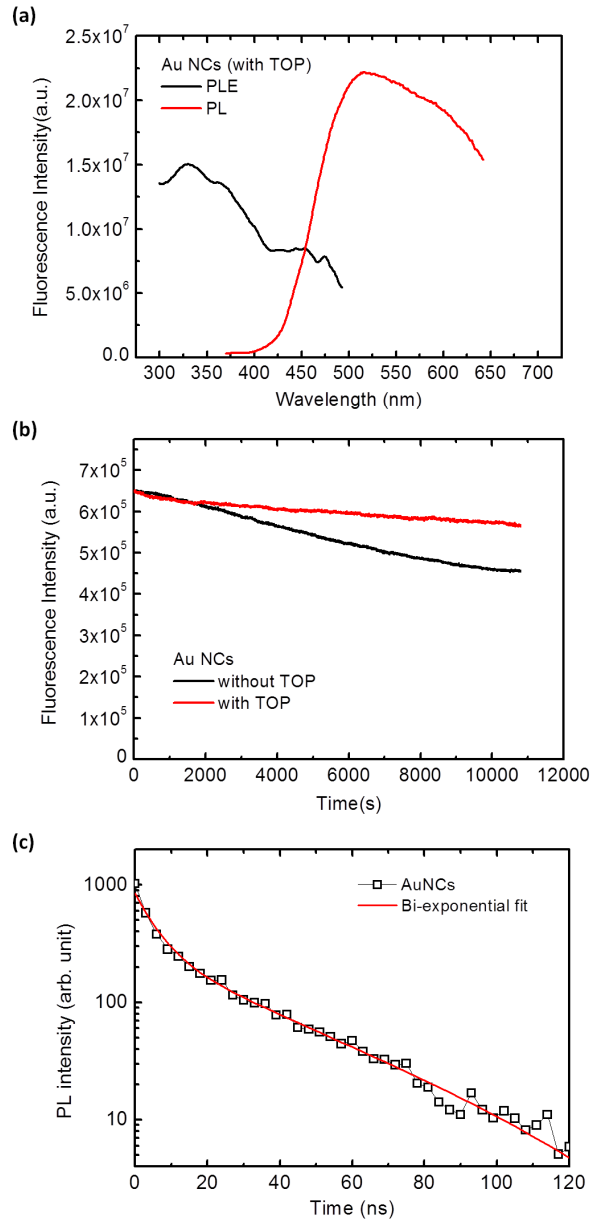

**Figure S2.** (a) Photoluminescence and photoluminescence excitation spectrum of Au NCs with TOP surface modification. (b) Fluorescence intensity as a function of time of Au NCs with or without TOP surface modification under UV irradiation. (c) Fluorescence lifetime of Au NCs with TOP surface modification.

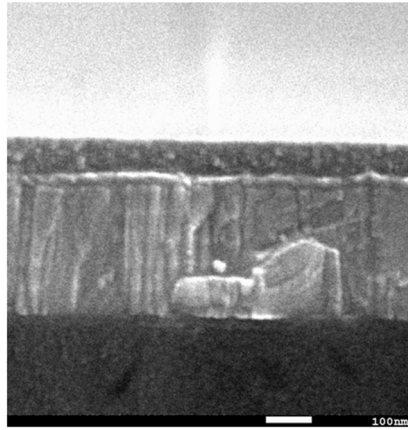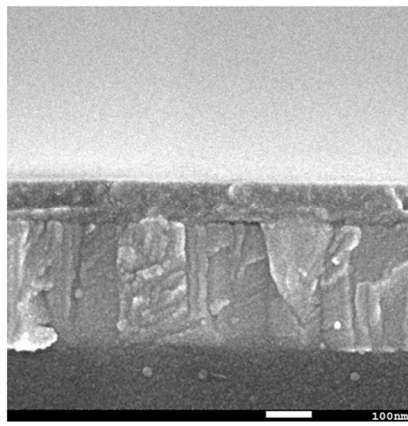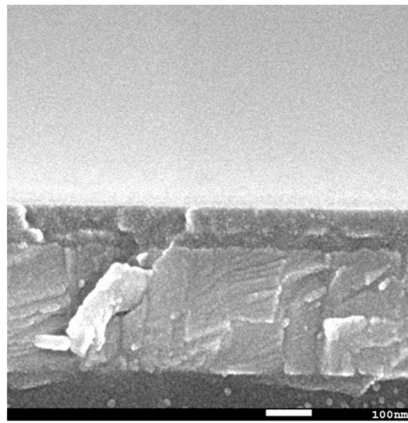

**Figure S3.** SEM images of the emissive layers prepared on Glass/ITO/PEDOT:PSS substrates.

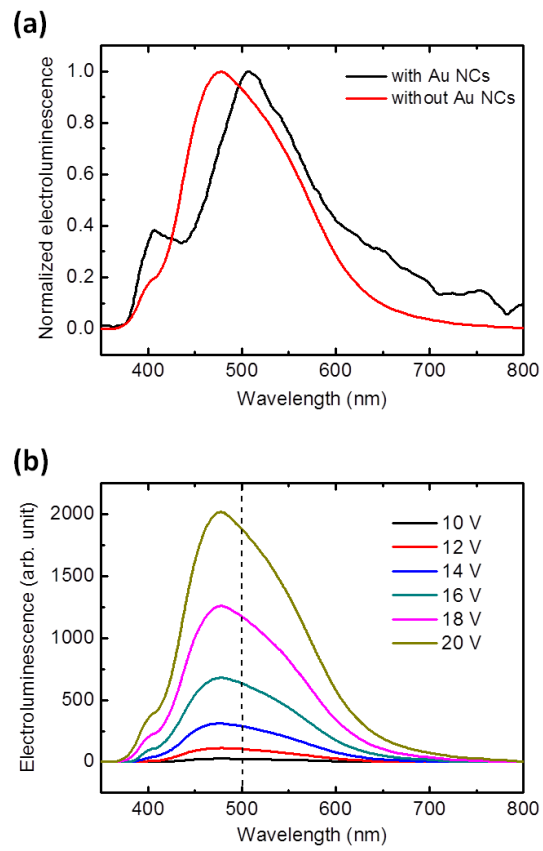

**Figure S4.** (a) Electroluminescence spectrum of the LEDs with and without Au NCs. (b) Electroluminescence spectra of the LED without Au NCs under various voltage biases.

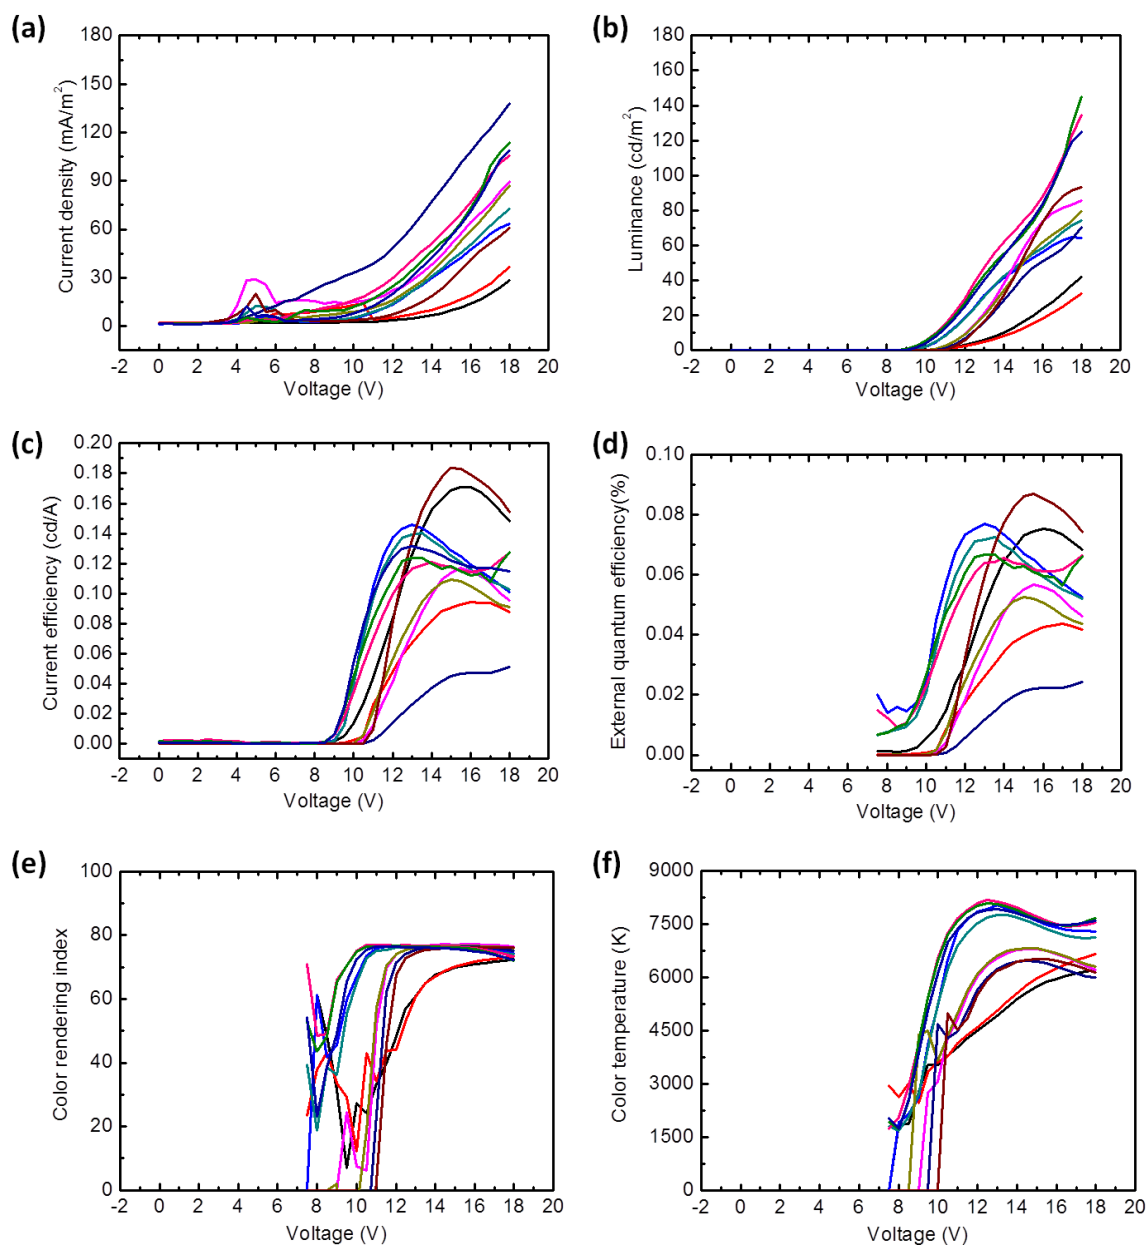

**Figure S5.** (a) Current density, (b) luminance, (c) current efficiency, (d) external quantum efficiency, (e) color rendering index, and (f) color temperature of eleven Au NCs LEDs.

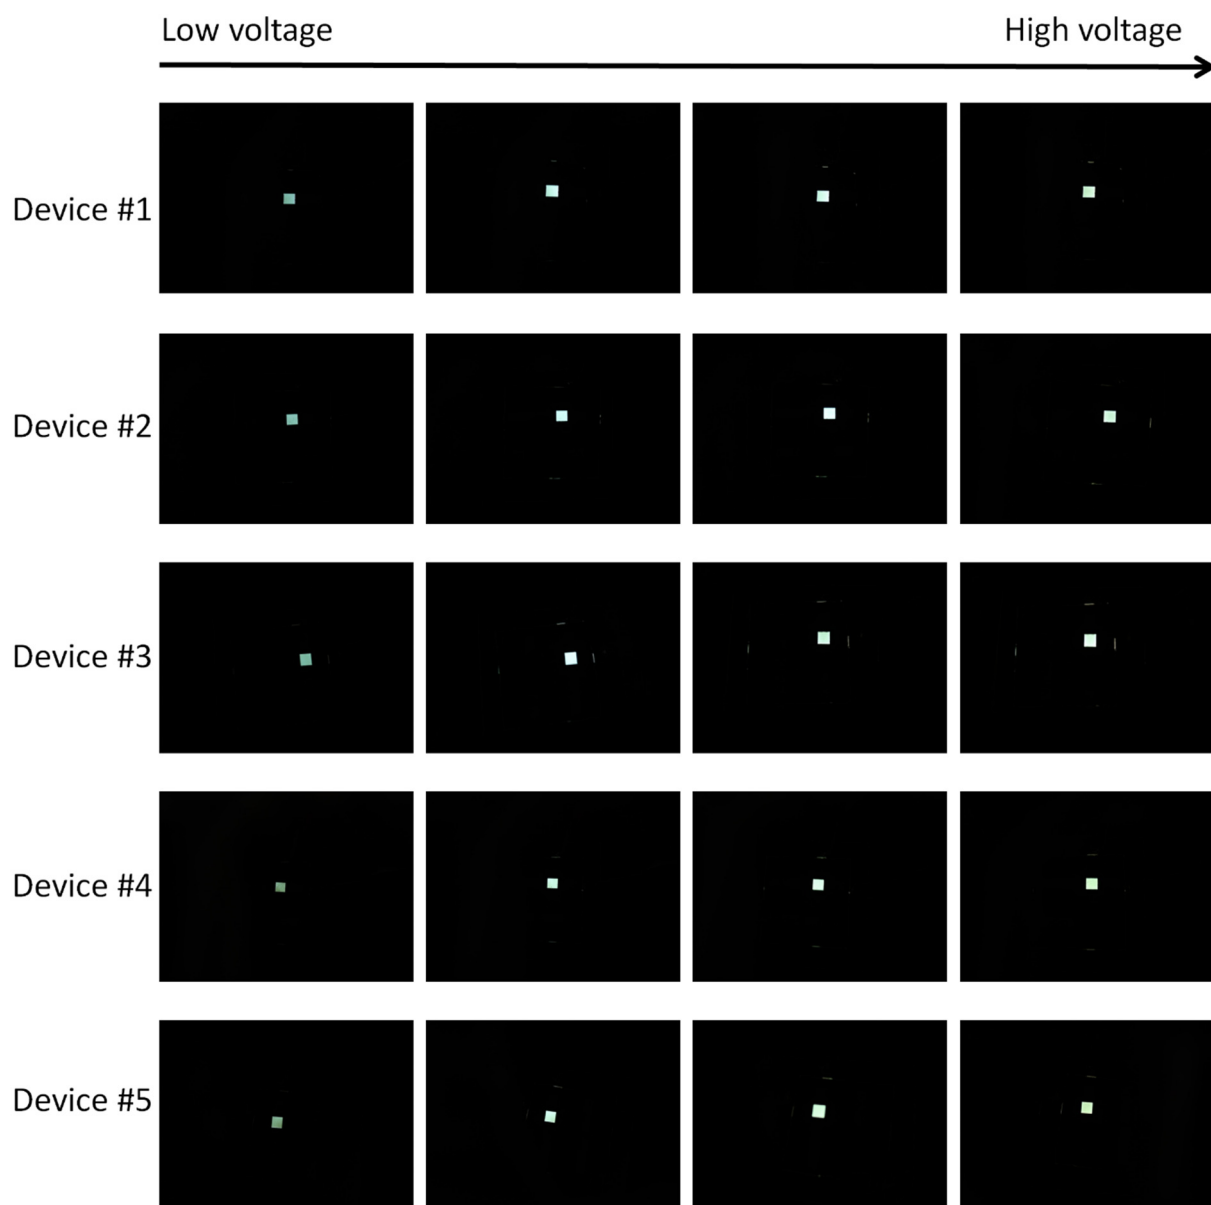

**Figure S6.** Photographs of five devices under various forward biases.

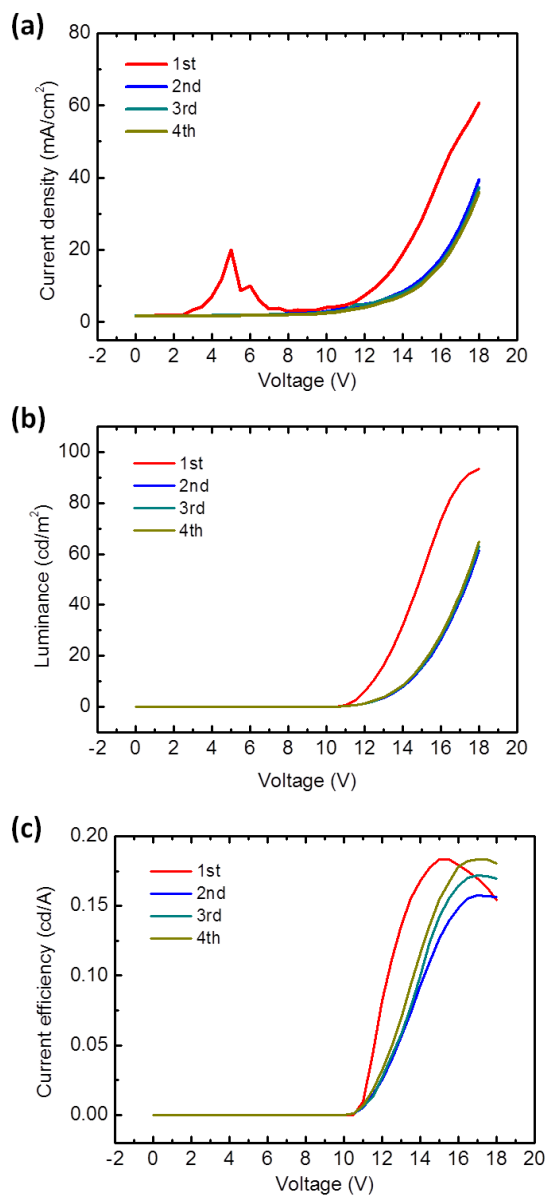

**Figure S7.** (a) Current density, (b) luminance, and (c) current efficiency measurements are repeated for an Au NC LED.
